# Supplementary material for: High Incidence of Noonan Syndrome Features Including Short Stature and Pulmonic Stenosis in Patients carrying NF1 Missense Mutations Affecting p.Arg1809: Genotype–Phenotype Correlation
Source: PubMed Central journal article supplement — Hum Mutat. 2015 Aug 21;36(11):1052–63. doi: 10.1002/humu.22832 (PMC5049609; doi:10.1002/humu.22832), 2015-08-21
Supplement: HUMU-36-1052-s001.pdf [file HUMU-36-1052-s001.pdf]

## Supporting Information for the article

### High Incidence of Noonan Syndrome Features including short stature and Pulmonic Stenosis in patients carrying *NFI* Missense Mutations Affecting p.Arg1809: Genotype-Phenotype Correlation

Kitiwan Rojnueangnit<sup>1,2,†</sup>, Jing Xie<sup>1,†</sup>, Alicia Gomes<sup>1</sup>, Angela Sharp<sup>1</sup>, Tom Callens<sup>1</sup>, Yunjia Chen<sup>1</sup>, Ying Liu<sup>1</sup>, Meagan Cochran<sup>1</sup>, Mary-Alice Abbott<sup>3</sup>, Joan Atkin<sup>4</sup>, Dusica Babovic-Vuksanovic<sup>5</sup>, Christopher P. Barnett<sup>6</sup>, Melissa Crenshaw<sup>7</sup>, Dennis W. Bartholomew<sup>4</sup>, Lina Basel<sup>8</sup>, Gary Bellus<sup>9</sup>, Shay Ben-Shachar<sup>10</sup>, Martin G. Bialer<sup>11</sup>, David Bick<sup>12</sup>, Bruce Blumberg<sup>13</sup>, Fanny Cortes<sup>14</sup>, Karen L. David<sup>15</sup>, Anne Destree<sup>16</sup>, Anna Duat-Rodriguez<sup>17</sup>, Dawn Earl<sup>18</sup>, Luis Escobar<sup>19</sup>, Marthanda Eswara<sup>20</sup>, Begona Ezquieta<sup>21</sup>, Ian Frayling<sup>22</sup>, Moshe Frydman<sup>23</sup>, Kathy Gardner<sup>24</sup>, Karen W. Gripp<sup>25</sup>, Concepcion Hernández-Chico<sup>26</sup>, Kurt Heyrman<sup>27</sup>, Jennifer Ibrahim<sup>28</sup>, Sandra Janssens<sup>29</sup>, Beth A Keena<sup>30</sup>, Isabel Llano-Rivas<sup>31</sup>, Kathy Leppig<sup>32</sup>, Cynthia Lim<sup>33</sup>, Marie McDonald<sup>34</sup>, Vinod K. Misra<sup>35</sup>, Jennifer Mulbury<sup>36</sup>, Vinodh Narayanan<sup>33</sup>, Naama Orenstein<sup>37</sup>, Patricia Galvin-Parton<sup>38</sup>, Helio Pedro<sup>39</sup>, Eniko K. Pivnick<sup>40</sup>, Cynthia M. Powell<sup>41</sup>, Linda Randolph<sup>42</sup>, Salmo Raskin<sup>43</sup>, Karol Rubin<sup>44</sup>, Margretta Seashore<sup>45</sup>, Christian P. Schaaf<sup>46</sup>, Angela Scheuerle<sup>47</sup>, Meredith Schultz<sup>48</sup>, Elizabeth Schorry<sup>49</sup>, Rhonda Schnur<sup>50</sup>, , Christopher Simotas<sup>27</sup>, Elizabeth Siqveland<sup>51</sup>, Amanda Tkachuk<sup>8</sup>, James Tongsgard<sup>52</sup>, Kevin Trude<sup>53</sup>, Meena Upadhyaya<sup>21</sup>, Ishwar C. Verma<sup>54</sup>, Stephanie Wallace<sup>17</sup>, Charles Williams<sup>55</sup>, Elaine Zackai<sup>30</sup>, Jonathan Zonana<sup>56</sup>, Conxi Lazaro<sup>57</sup>, Kathleen Claes<sup>28</sup>, Bruce Korf<sup>1</sup>, Yolanda Martin<sup>25</sup>, Eric Legius<sup>58</sup>, Ludwine Messiaen<sup>1,\*</sup>

**MEDICAL GENOMICS LABORATORY: NF1/SPRED1 PHENOTYPIC CHECKLIST FORM**

**UAB**

Patient ID: \_\_\_\_\_ Date of Exam: \_\_/\_\_/\_\_

Referring Physician: \_\_\_\_\_

**DEMOGRAPHIC INFORMATION**

Gender:  Male  Female Date of Birth: \_\_/\_\_/\_\_

Ethnicity: Mother:  White  Black  Native American  Hispanic  Asian  Other  
 Father:  White  Black  Native American  Hispanic  Asian  Other

**DIAGNOSIS**

NIH criteria:  >6 CAL spots >5mm, postpubertal >15mm  Optic glioma  
 >2 neurofibromas or 1 plexiform NF  >2 Lisch nodules  
 Axillary or inguinal freckling  A distinct osseous lesion  
 First degree relative diagnosed with NF1 by above criteria  
 Does patient fulfill NIH diagnostic criteria for NF1?  Yes  No

Clinical diagnosis:  NF1  Multiple CAL spots  Familial multiple CAL spots  
 Spinal NF  Isolated neurofibromas  Segmental NF1  
 NF Noonan  Single NF1 feature  Watson Syndrome  
 Legius syndrome  Unknown

Family history:  Sporadic (proband is a 'founder')  Familial (proband is a 'non-founder')  Unknown  
 Consanguinity:  Yes  No  Unknown

**GENERAL INFORMATION**

Height: \_\_\_\_cm Head circumference: \_\_\_\_cm Weight: \_\_\_\_kg

**NF SIGNS AND SYMPTOMS**

1) **CAL spots:**  0  1-5  ≥6 to 100  >100  
 General impression on the borders of the CAL-spots:  
 typical well-defined smooth borders diameter \_\_\_\_\_  
 irregular margins, ragged borders diameter \_\_\_\_\_  
 for detail on size and location of the CAL-spots and other hyper/hypopigmentation areas: page 3.

2) **Skin fold freckling:**  None  Left  Right  Comments (e.g. very faint,....): \_\_\_\_\_  
 Groin  Axilla  Submammary

3) **Lisch nodules:**  None  Left  Right  Unknown

4) **Cutaneous neurofibromas (soft nodules that project above the skin):** histopathologically confirmed: Y / N  
 0  2-6  6-99  100-500  >500

5) **Intradermal neurofibromas (soft depression within the skin w/ pinkish overlying discoloration):** histopathologically confirmed: Y / N  
 0  2-6  6-99  100-500  >500

6) **Subdermal neurofibromas (firm nodules palpable underneath the skin):** histopathologically confirmed: Y / N  
 0  2-6  6-99  100-500  >500

1/3 updated 4/3/2013

**MEDICAL GENOMICS LABORATORY: NF1/SPRED1 PHENOTYPIC CHECKLIST FORM**

**UAB**

7) **Plexiform neurofibromas:** histopathologically confirmed: Y / N  
 None  visible from outside  with hyperpigmentation  
 without hyperpigmentation  
 internal

Head  Neck  Trunk  L Arm  L Hand  L Leg  L Foot  
 Abdomen  Pelvis  Genital area  R Arm  R Hand  R Leg  R Foot

8) **Spinal neurofibromas (neurofibromas arising from the spinal nerve roots):** histopathologically confirmed: Y / N  
 Unknown  Absent by MRI  Present, asymptomatic  
 Present, symptomatic  
 If present: please provide detail on figure page 4  
 unilateral or  bilateral: \_\_\_\_\_ s \_\_\_\_\_ regions.  
 C \_\_\_\_\_ T \_\_\_\_\_ S \_\_\_\_\_

9) **Optic glioma:**  Unknown  Absent by MRI  Present by MRI, symptomatic  
 Present by MRI, asymptomatic  
 Nerve (L and/or R)  Chiasm  
 Present by MRI, asymptomatic  
 Nerve (L and/or R)  Chiasm

10) **Other neoplasms:**  None  Hypothalamic glioma  Brainstem glioma  Other glioma  
 MPNST  MIMT  Rhabdomyosarcoma  
 Pheochromocytoma  Colonic polyps  Lipoma  
 juvenile xanthogranuloma  Breast cancer  
 schwannoma  Other, specify: \_\_\_\_\_

11) **Skeletal Abnormalities:**  None  Long bone dysplasia  Pseudoarthrosis  Sphenoid wing dysplasia  
 Bone cysts  scoliosis  Dysplastic vertebrae  
 pectus excavatum  pectus carinatum  Other: \_\_\_\_\_

12) **Cardiovascular disease:**  Absent  Unknown  Present:  
 Hypertension  Renal artery stenosis  VSD  Pulmonic stenosis  Moya moya  ASD  Aortic stenosis

13) **Development:**  Normal  Exam not done  
 Abnormal  ADD  speech delay  Hyperactivity  autism  Learning disability  pervasive developmental delay  
 IQ: Full scale \_\_\_\_\_ Verbal \_\_\_\_\_ Performance \_\_\_\_\_

14) **Education:**  Too young for school  HS completion  At or above age level  College graduate  Below age level  Higher degree  Unknown

2/3 updated 4/3/2013

**MEDICAL GENOMICS LABORATORY: NF1/SPRED1 PHENOTYPIC CHECKLIST FORM**

**UAB**

15) **Noonan phenotype:**  Absent  Possible  Unknown  
 Present:  Short stature  Low set ears  Pulmonic Stenosis  
 Hypertrichosis  Webbed neck  peak jet velocity \_\_\_\_m/s  
 Midface hypoplasia  PTPN11 testing done? Result \_\_\_\_\_  
 PTPN11 testing done? Result \_\_\_\_\_  
 peak gradient \_\_\_\_mmHg across pulmonic valve

16) **Segmental NF phenotype:**  Absent  Possible  
 location/size of pigmentary lesions and/or neurofibromas

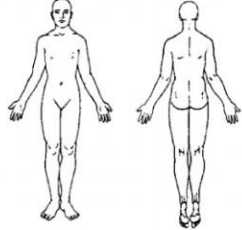

Indicate size and location of  
 Neurofibromas   
 CAL-spots   
 Freckling   
 Hyperpigmented region

17) **location of spinal tumors (if present)**



18) **any other comments/remarks:**

3/3 updated 4/3/2013

Supp. Figure S1. Standardized phenotypic checklist used to document the phenotype of the individuals included in this study.

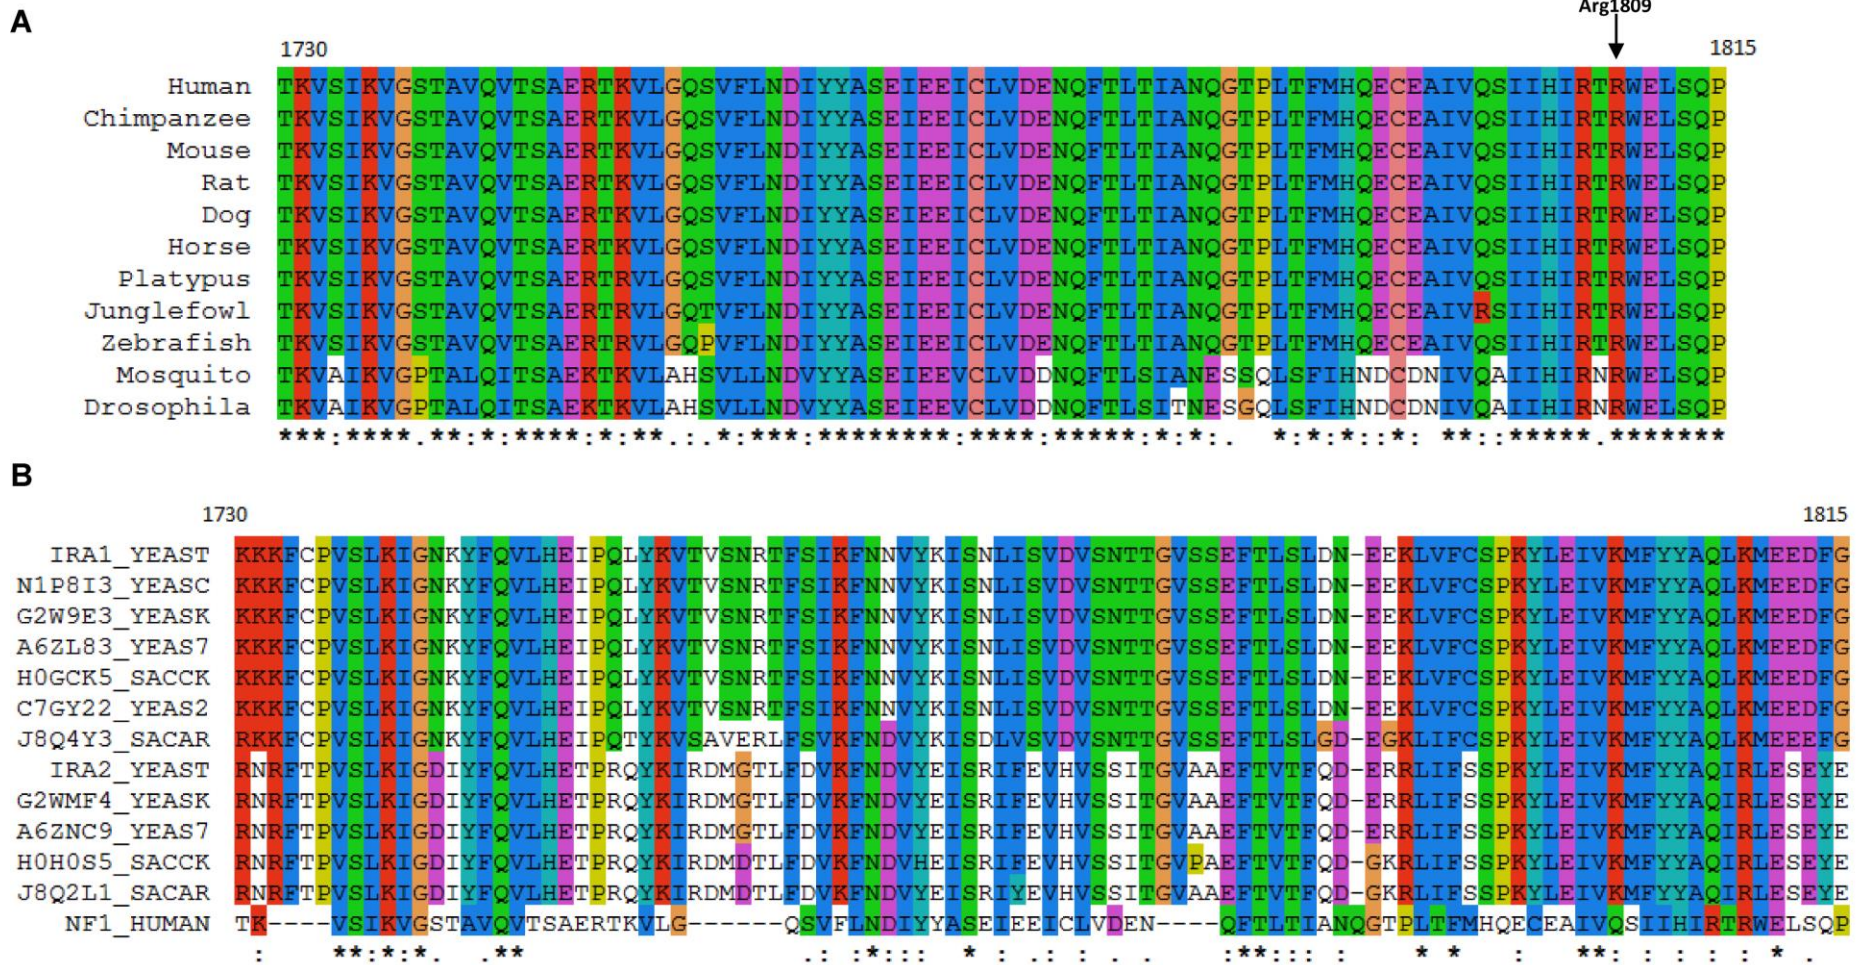

**Supp. Figure S2.** **A.** Multiple sequence alignment of a region of NF1. NF1 from 11 different species were included in the alignment: Human, RefSeq: NP\_000258.1 residues 1730-1815; Chimpanzee, TrEMBL: K7DMZ3 residues 1730-1815; Mouse, SWISSPROT: Q04690-2 residues 1732-1817; Rat, SWISSPROT: P97526 residues 1732-1817; Dog, RefSeq: XP\_537738.3 residues 1736-1821; Horse TrEMBL: F6XRM7 residues 1665-1750; Platypus, RefSeq: XP\_007664859.1 residues 1787-1872; Junglefowl, RefSeq: XP\_003642464.1 residues 1725-1810; Zebrafish, TrEMBL: E7FBD0 residues 1720-1805; Mosquito, TrEMBL: B0WYP5 residues 1739-1824; and Drosophila, TrEMBL: O01397 residues 1782-1867. The multiple sequence alignment was performed with ClustalW2 program. **B.** Multiple sequence alignment of Human NF1 residue 1730-1815 (isoform2), and corresponding regions of yeast IRA1 and IRA2. Human NF1 (NF1\_HUMAN, i.e. RefSeq NP\_000258.1), 7 yeast IRA1 (IRA1\_YEAST, N1P8I3\_YEASC, G2W9E3\_YEASK, A6ZL83\_YEAS7, H0GCK5\_SACCK, C7GY22\_YEAS2, J8Q4Y3\_SACAR) and 5 yeast IRA2 (IRA2\_YEAST, G2WMF4\_YEASK, A6ZNC9\_YEAS7, H0H0S5\_SACCK, J8Q2L1\_SACAR) sequences were included in the alignment. The multiple sequence alignment was performed with ClustalW2 program.



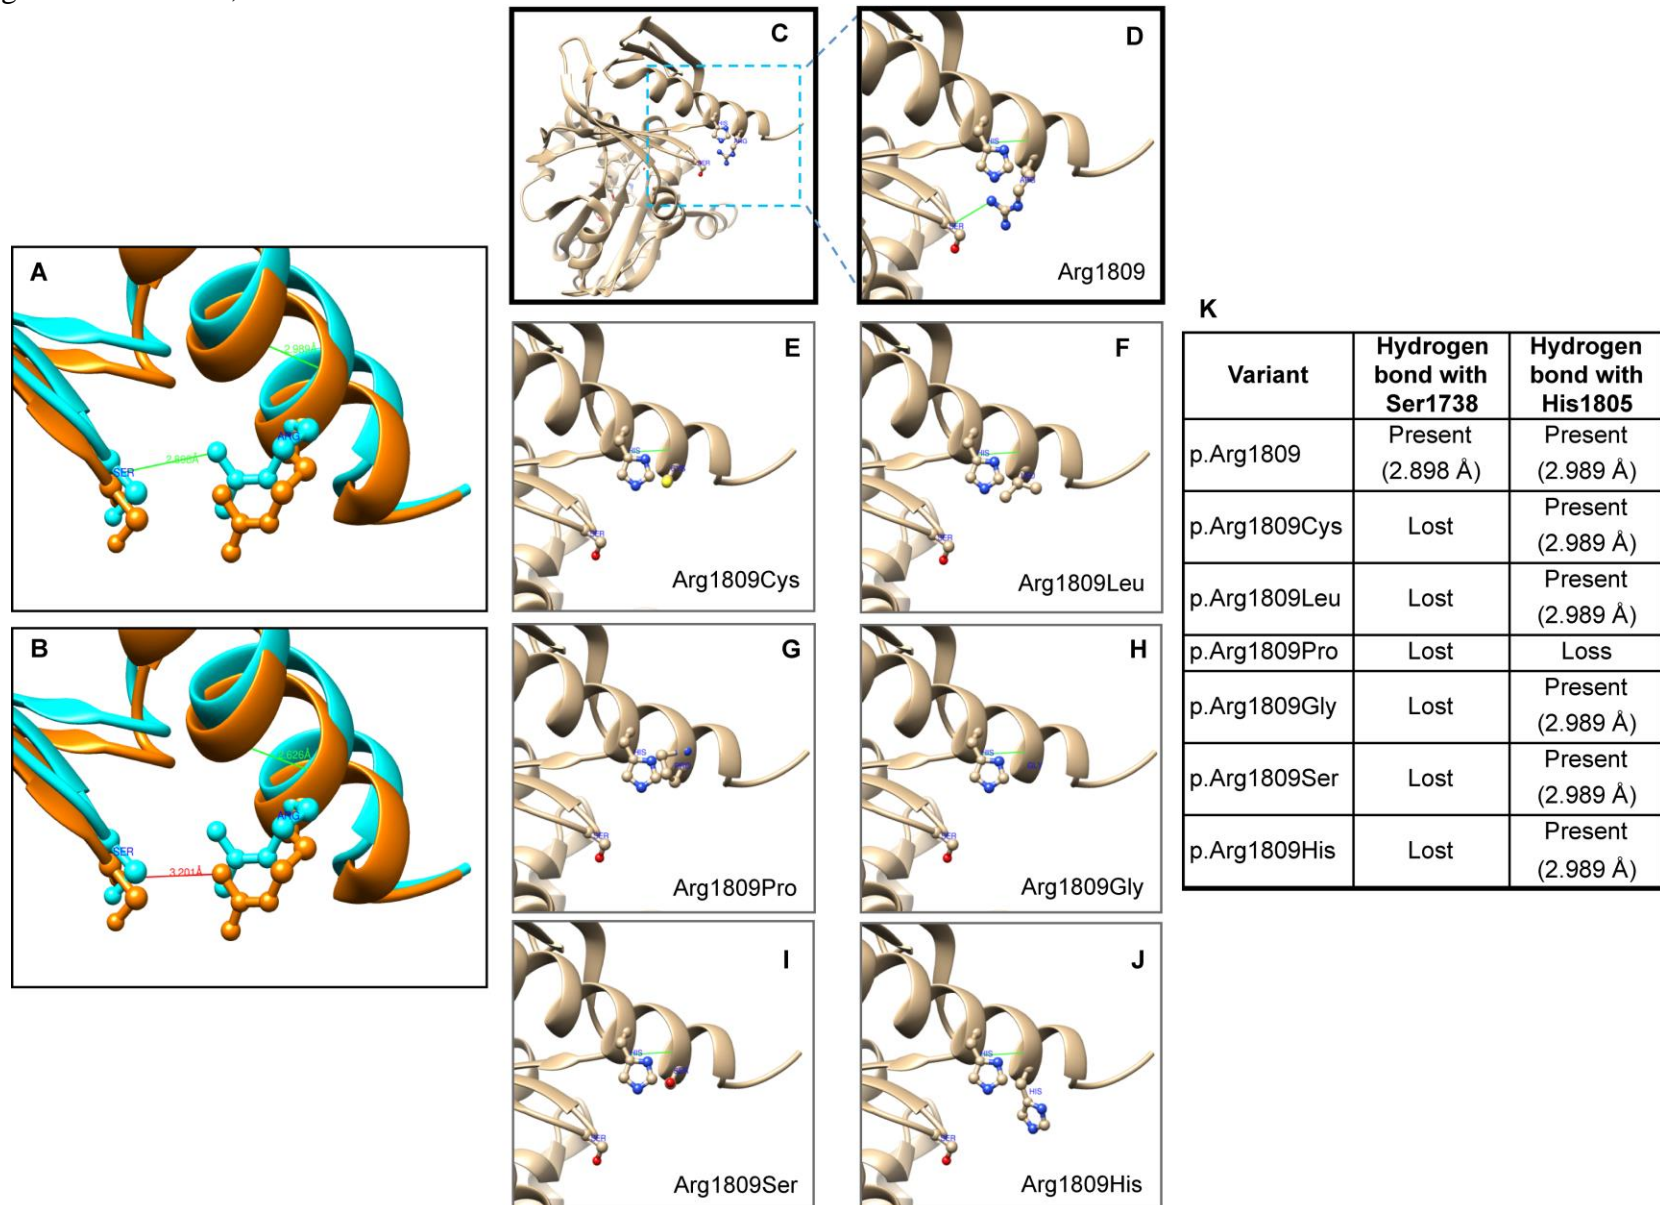

**Supp. Figure S3. A and B:** Comparison of H-bonds involving the residue Arg1809 in two crystal structures of human NF1, PDB-Accession code: 2D4Q and 2E2X. Crystal structures of human NF1 (2D4Q in cyan and 2E2X in orange) were overlaid and close-up views of Arg1809 and its H-bonds with Ser1738 the His1805 were shown: (A) 2D4Q and (B) 2E2X. Two structures show a slight difference: for **2D4Q**, the donor-acceptor distances between Arg1809-His1805 is 2.989 Å and Arg1809-Ser1738 is 2.898 Å; for **2E2X**, the distances are 2.626 Å and 3.201 Å, respectively.

Most H-bonds in proteins are in the moderate category with donor-acceptor distances at 2.5 Å ~3.2 Å. In the figures, moderate H-bonds were marked with green lines and weak ones were marked with red lines (donor-acceptor distances at 3.2 Å ~4.0 Å).

**C to K:** Tertiary structure prediction of human NF1 p.Arg1809 mutations. **(C)** Crystal structure of human NF1 (PDB-Accession code: 2D4Q, detergent bound form), in which three residues Arg1809, Ser1738 and His1805 were highlighted. **(D)** Zoomed view of the three residues (Arg1809, Ser1738 and His1805) and H-bonds (shown as green line) involving the residue Arg1809. **(E-J)** Zoomed view of NF1 p.Arg1809 mutations: Arg1809Cys **(E)**, Arg1809Leu **(F)**, Arg1809Pro **(G)**, Arg1809Gly **(H)**, Arg1809Ser **(I)**, and Arg1809His **(J)**. The H-bonds involving p.Arg1809 mutations (Cys, Leu, Pro, Gly, Ser and His) were shown as green lines and a summary of the H-bond alterations based on 2D4Q 3D model was listed in the table (Panel K).

2E2X was also used to analyze p.Arg1809 mutations (results not shown) and the results showed no difference compared to 2D4Q, except for the mutation Arg1809Pro. In 2D4Q, the mutation Arg1809Pro leads to loss of both H-bonds with Ser1738 and His1805; however, in 2E2X, only the weak H-bond with Ser1738 is lost, the H-bond with His1805 retains, just like all other p.Arg1809 mutations.

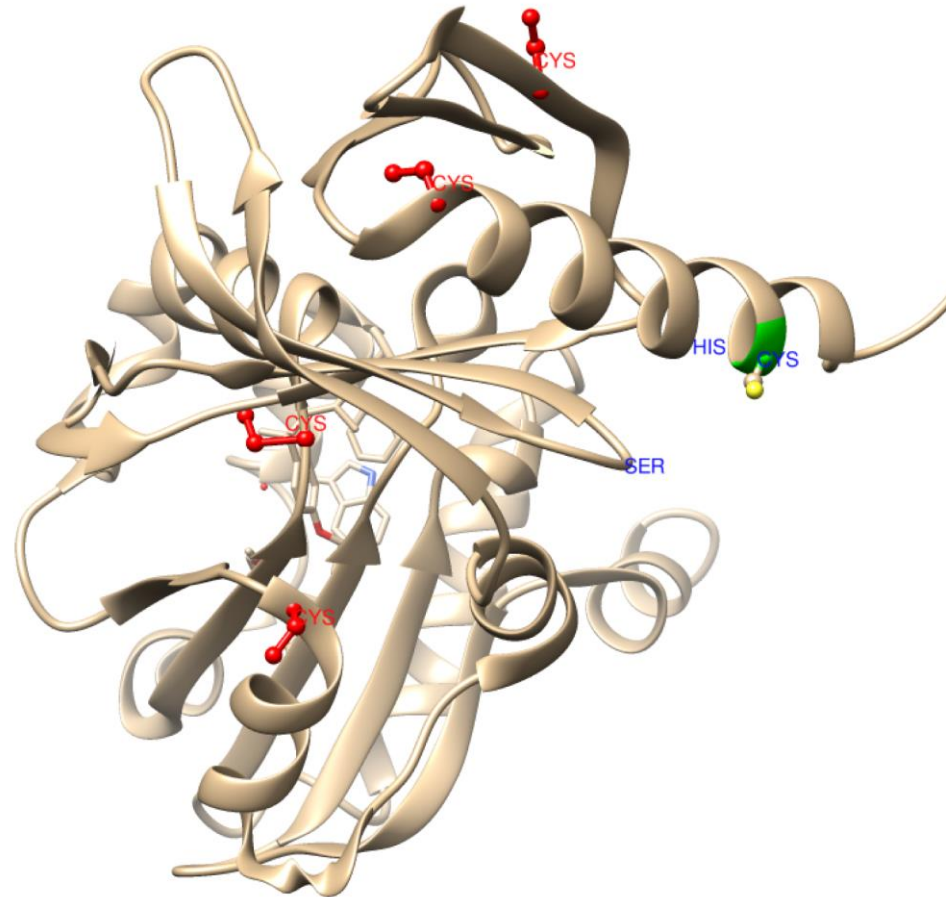

**Supp. Figure S4.** 3D structure of the 2D4Q detergent-bound form. Localization of all Cys side chains (red) within the Sec14-PH domain, with Arg1809Cys depicted in green. None of these Cysteines are located at a distance that would allow p.Arg1809Cys to engage in a disulfide bond.

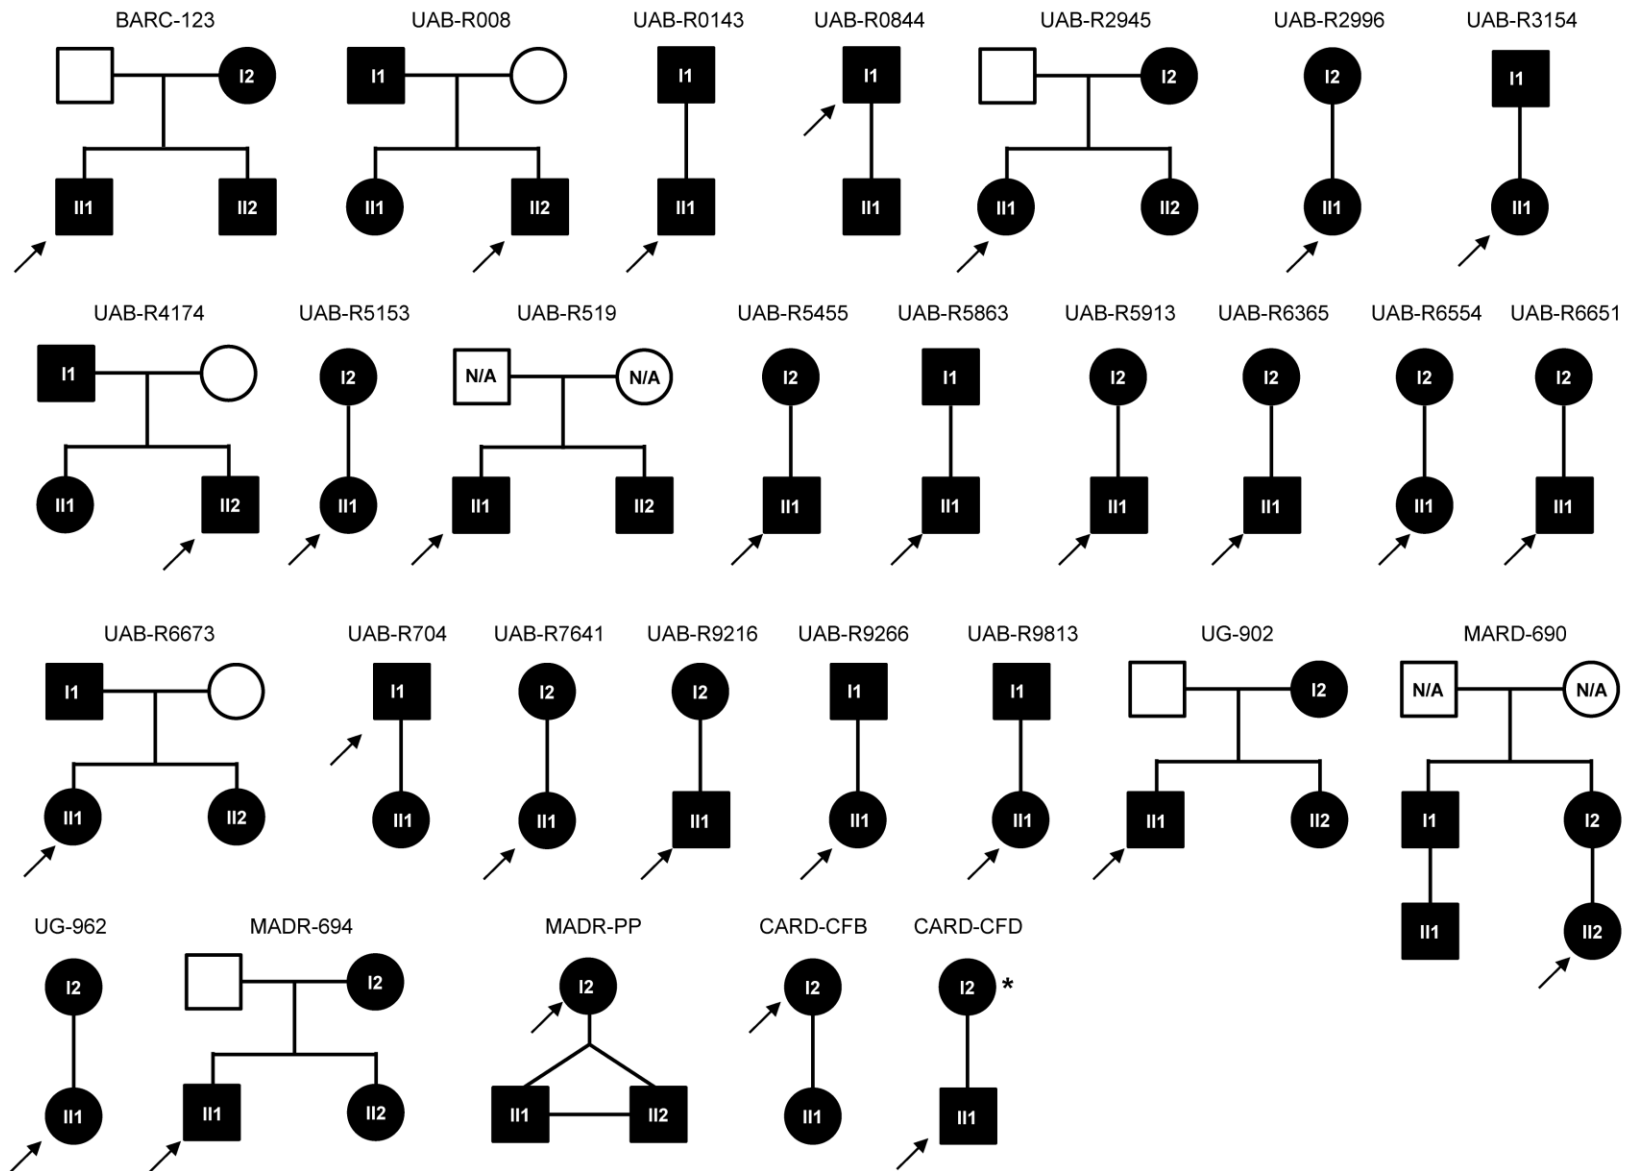

**Supp. Figure S5.** Pedigrees of the familial cases in this study. The filled symbols represent the patients who are positive for Arg1809 mutations, and the open symbols are relatives who are negative for the family specific mutations. Note that “N/A” indicates the relatives were not available for genetic analysis. The arrow annotates the proband of the family. For the first generation, father is always I1 and mother is I2.

\*: Limited clinical information was provided for CARD-CFD-I2 (“multiple CALs and mutation positive”), therefore this individual is only mentioned in the comments section in the Supp. Table S2.

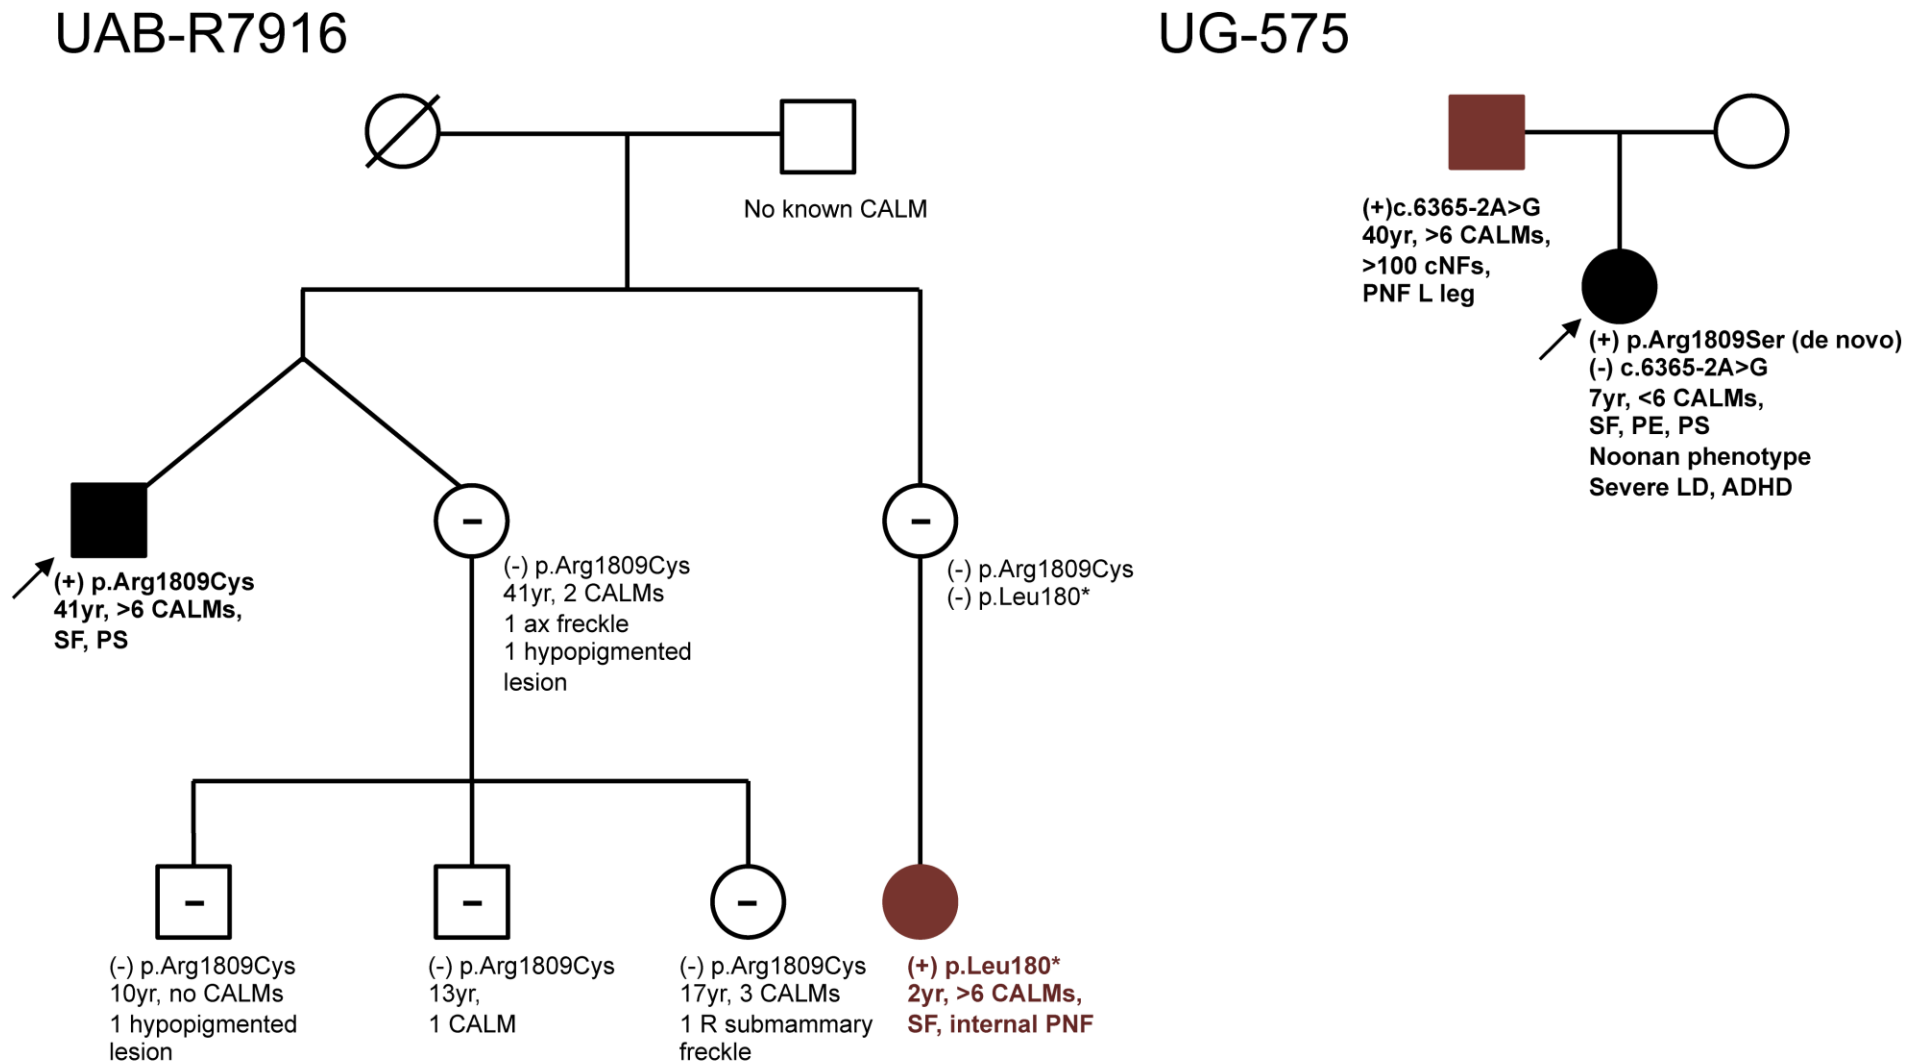

**Supp. Figure S6.** Pedigrees of two families with a missense mutation at p.Arg1809 in the proband: p.Arg1809Cys in family UAB-R7916 and p.Arg1809Ser in family UG-575. A different truncating mutation was identified in both families in a 2<sup>nd</sup>-degree (UAB-R7916) or 1<sup>st</sup>-degree relative (UG-575) presenting with classic NF1 (depicted in dark brown).

**Abbreviations:** yr, years; CALM, café-au-lait macule; SF, skinfold freckling; PS, pulmonic stenosis; ax, axillary; R, right; L, left; PNF, plexiform neurofibroma; (-), mutation absent; cNF, cutaneous neurofibroma; PE, pectus excavatum; LD, learning disability; ADHD, attention deficit hyperactivity disorder.



**Supp. Table S1. Clinical details for 136 individuals from 98 different families carrying a constitutional *NF1* missense mutation affecting p.Arg1809****Supp. Table S1 is included as a separate Excel file under the Supporting Information for this article.**

<sup>a</sup>. two distinct pathogenic *NF1* mutations were identified in the family (see also Supp. Figure S6)

<sup>b</sup>. exact ages were used to calculate Height and Head Circumferences, but data are provided as "age-groups" in this Table: 0-24 months; 2-4 years; 5-8 years; 9-13 years; 14-18 years; 19-26 years; >26 years

<sup>c</sup>. fulfilling NIH criteria when taking family history into account and assuming the patient indeed has few small neurofibromas (none however histopathologically proven, nor biopsied)

<sup>d</sup>. height evaluated using the WHO or CDC charts results in value  $PC \leq 3$  but given the Hispanic or Asian ethnicity this patient is not considered to have true Short Stature due to the lack of ethnic-specific growth charts. [ ] height percentiles for Hispanic and Asian individuals are provided between square brackets to indicate that they were not included for the data analysis on frequency of short stature.

<sup>e</sup>. The patients UAB-R2376, MARD-690-II2 and MARD-690-II1 were NOT considered having cognitive impairment/LD, despite presence of ADHD/ADD, as the referring physician said "normal development and IQ" on the phenotypic checklist.

**Abbreviations:** Ethnicity: W: white; His: hispanic; AA: African American; As: Asian; NaA: Native American; Pa: Pakistani; Ar: Arabic; In: Indian; A, African; F, Familial; PrS, proven sporadic; RS, reportedly sporadic; UN, unknow; PC, Percentile; NS, Not specified, i.e. no value provided on the phenotypic checklist; N, UN, no symptomatic optic glioma (OG), unknown if an asymptomatic OG is present as no MRI data available; LD, learning disability; HTL, hypertelorism; MH, midface hypoplasia; SS, short stature; WN, webbed neck; DPF, downslanting palpebral fissures; LSE, low Set ears; PC, pectus carinatum; PE, pectus excavatum; PS, pulmonic stenosis; Pt, ptosis; SN, short neck; EF, epicanthus folds; LPH, low posterior hairline; BBE, bright blue eyes; PRE, posteriorly rotated ears; DD, developmental delay; SD, speech delay; PNF, plexiform neurofibromas.

**Supp. Table S2. *In silico* prediction of pathogenicity of all possible missense mutations affecting Arg1809, and effect on splicing as observed *in vivo* (RNA from lymphocytes)**

| Mutation  | Protein      | Mutation Frequency        |                                           |                         | Grantham distance | SIFT               | MutationTaster        | PolyPhen                                       | CADD v1.0 | MutPred Splice prediction                | RNA observed                                                                     | Other evidence                                                                                                                                                                                                                                                                                                                                                                                                                                                                                                                       |
|-----------|--------------|---------------------------|-------------------------------------------|-------------------------|-------------------|--------------------|-----------------------|------------------------------------------------|-----------|------------------------------------------|----------------------------------------------------------------------------------|--------------------------------------------------------------------------------------------------------------------------------------------------------------------------------------------------------------------------------------------------------------------------------------------------------------------------------------------------------------------------------------------------------------------------------------------------------------------------------------------------------------------------------------|
|           |              | Arg1809-positive probands | <i>NFI</i> - positive probands UAB cohort | ExAC control population |                   |                    |                       |                                                |           |                                          |                                                                                  |                                                                                                                                                                                                                                                                                                                                                                                                                                                                                                                                      |
| c.5425C>G | p.Arg1809Gly | 1/98                      | 0/7000                                    | 0/61,486                | 125               | deleterious (0.02) | disease causing (p=1) | probably damaging 0.991 (sens 0.71; spec 0.97) | 21.9      | 0.43 - Splice Neutral Variant            | normal                                                                           | segregation in family MADR-690                                                                                                                                                                                                                                                                                                                                                                                                                                                                                                       |
| c.5425C>T | p.Arg1809Cys | 75/98                     | 67/7000                                   | 0/61,486                | 180               | deleterious (0.00) | disease causing (p=1) | probably damaging 1.000 (sens 0.00; spec 1.00) | 23.5      | 0.42 - Splice Neutral Variant            | normal                                                                           | segregation multiple families (BARC-123; UAB-R008; UAB-R0143; UAB-R2945; UAB-R3154; UAB-R4174; UAB-R5153; UAB-R519; UAB-R5455; UAB-R5863; UAB-R5913; UAB-6554; UAB-R6651; UAB-R6673; UAB-R704; UAB-R7464; UAB-R7641; UAB-R9216; UAB-R9266; UG-902; UG-962); proven de novo multiple probands (UAB-R1583; UAB-R2261; UAB-R2635; UAB-R3175; UAB-R3412; UAB-R3885; UAB-R3926; UAB-R3933; UAB-R4816; UAB-R4844; UAB-R6935; UAB-R7626; UAB-R8141; UAB-R9044; UAB-R9851); somatic mutation in melanocytes of segmental patient UAB-RSeNF23 |
| c.5425C>A | p.Arg1809Ser | 3/98                      | 1/7000                                    | 0/61,486                | 110               | deleterious (0.02) | disease causing (p=1) | probably damaging 0.991 (sens 0.71; spec 0.97) | 24.3      | 0.41 - Splice Neutral Variant            | normal                                                                           | proven de novo (UG-575; UAB-R4906)                                                                                                                                                                                                                                                                                                                                                                                                                                                                                                   |
| c.5426G>T | p.Arg1809Leu | 15/98                     | 13/7000                                   | 0/61,486                | 102               | deleterious (0.02) | disease causing (p=1) | probably damaging 0.979 (sens 0.76; spec 0.96) | 34        | 0.69 - Splice Affecting Variant - Strong | skipping of exon 2 (OOF) and exon 29+30 (OOF) in a small fraction of transcripts | segregation in multiple families (UAB-R0844; UAB-R6365; UAB-R9813; CARD-CFD); proven de novo (UAB-R7171; UAB-R7545; UAB-R8423; CARD-CFE)                                                                                                                                                                                                                                                                                                                                                                                             |
| c.5426G>C | p.Arg1809Pro | 4/98                      | 4/7000                                    | 0/61,486                | 103               | deleterious (0.02) | disease causing (p=1) | probably damaging 0.998 (sens 0.27; spec 0.99) | 29.3      | 0.57 - Splice Neutral Variant            | skipping of exon 2 (OOF) and exon 29+30 (OOF) in a small fraction of transcripts | proven de novo (UAB-R3133; UAB-R7442)                                                                                                                                                                                                                                                                                                                                                                                                                                                                                                |
| c.5426G>A | p.Arg1809His | 0/98                      | 0/7000                                    | 0/61,486                | 29                | deleterious (0.02) | disease causing (p=1) | probably damaging 0.997 (sens 0.41; spec 0.98) | 34        | 0.46 - Splice Neutral Variant            | ND                                                                               | not observed                                                                                                                                                                                                                                                                                                                                                                                                                                                                                                                         |

**Abbreviations:** sens: Sensitivity; spec: Specificity

**Supp. Table S3. Cutaneous, dermal and/or subdermal neurofibromas in individuals  $\geq 19$  years old carrying a missense mutations at Arg1809 in this study and previous studies**

| Age group | This study                                                                    | Nyström et al, Ekvall et al, Pinna et al, Santoro et al | Total |
|-----------|-------------------------------------------------------------------------------|---------------------------------------------------------|-------|
| 19-26yrs  | 0/10                                                                          | 0/3                                                     | 0/13  |
| 27-35yrs  | 2/8 (1 with possible subdermal NF, 1 with 1-2 possible subdermal NF)          | 0/3                                                     | 2/11* |
| 36-50yrs  | 2/16 (1 with possible small NF on R forearm and 1 with possible subdermal NF) | 0/8                                                     | 2/24* |
| >50yrs    | 1/5 (1 with possible small subdermal NF)                                      | 0/6                                                     | 1/11* |

\* Clear-cut multiple cutaneous, dermal and/or subdermal neurofibromas were not seen in any individual. Few cases had 1-2 possible neurofibromas, but none were biopsied for histopathology.
